# Supplementary material for: Cuticular Swabs and eDNA as Non-Invasive Sampling Techniques to Monitor Aphanomyces astaci in Endangered White-Clawed Crayfish (Austropotamobius pallipes Complex)
Source: MDPI journal article supplement (doi:10.3390/d15020279), 2023-02-15
Supplement: s1 [file s1]

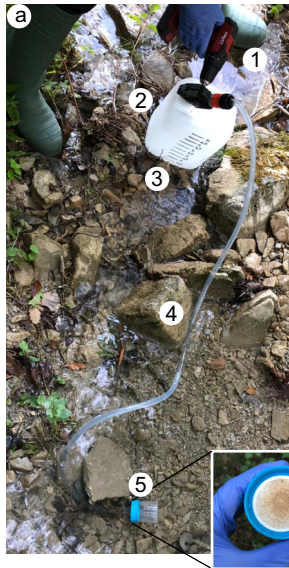

1. Cordless driver drill;
2. Peristaltic garden pump;
3. Tank;
4. Acetate hose;
5. Filter holder;
6. Fibreglass filter.

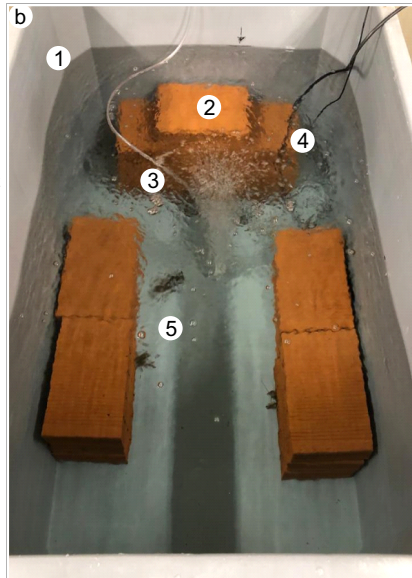

1. 300-litre plastic tank;
2. Hollow bricks;
3. Oxygenator
4. Termometer;
5. *P. clarkii*.

**Figure S1:** a) Environmental DNA filtering system during field activities; b) arrangement of *P. clarkii* tank during the in-house experiment.
