# Supplementary material for: Cuticular Swabs and eDNA as Non-Invasive Sampling Techniques to Monitor Aphanomyces astaci in Endangered White-Clawed Crayfish (Austropotamobius pallipes Complex)
Source: MDPI journal article supplement (doi:10.3390/d15020279), 2023-02-15
Supplement: s1 [file s1]

**Table S4.** Results of fourth different storing methods to preserve samples during in-field activities. Highly infested *A. pallipes* specimens were collected during a crayfish plague outbreak in the restocking facility in Friuli Venezia Giulia Region-Northern Italy in December 2013 (LIFE RARITY project). The absolute quantifications was expressed in copies/μl and noted was in scientific notation. Estimated quantification below LoD level reported in brown; N/A means no detected amplification or concordance between replicates. End-point PCR outcomes were reported as: positive (+) and negative (-). \*, indicates faint amplification.

| Sample             | IZSve Sample ID | Average Cr | Standard Deviation | Log Starting Quantities | PFU (copies/μl)        | end point PCR |
|--------------------|-----------------|------------|--------------------|-------------------------|------------------------|---------------|
| cuticles           | 160/ITT/20.1    | 27.05      | 0.21               | 3.2690564               | 1.86 × 10 <sup>3</sup> | +             |
| cuticles           | 160/ITT/20.2    | 25.15      | 0.13               | 3.8433174               | 6.97 × 10 <sup>3</sup> | +             |
| cuticles           | 160/ITT/20.3    | 27.78      | 0.37               | 3.0484193               | 1.12 × 10 <sup>3</sup> | +             |
| cuticles           | 160/ITT/20.4    | 28.33      | 0.13               | 2.8821858               | 7.62 × 10 <sup>2</sup> | +             |
| cuticles           | 160/ITT/20.5    | 23.71      | 0.07               | 4.2785468               | 1.90 × 10 <sup>4</sup> | +             |
| cuticles           | 160/ITT/20.6    | 25.91      | 0.16               | 3.613613                | 4.11 × 10 <sup>3</sup> | +             |
| cuticles           | 160/ITT/20.7    | 29.06      | 0.09               | 2.6615487               | 4.59 × 10 <sup>2</sup> | +             |
| cuticles           | 160/ITT/20.8    | 25.87      | 0.08               | 3.6257027               | 4.22 × 10 <sup>3</sup> | +             |
| cuticles           | 160/ITT/20.9    | 29.51      | 0.23               | 2.5255395               | 3.35 × 10 <sup>2</sup> | +             |
| cuticles           | 160/ITT/20.10   | 24.63      | 0.08               | 4.0004836               | 1.00 × 10 <sup>4</sup> | +             |
| cuticles           | 160/ITT/20.11   | 28.13      | 0.17               | 2.9426343               | 8.76 × 10 <sup>2</sup> | +             |
| cuticles           | 160/ITT/20.12   | 25.42      | 0.26               | 3.7617119               | 5.78 × 10 <sup>3</sup> | +             |
| cuticles           | 160/ITT/20.13   | 27.89      | 0.36               | 3.0151726               | 1.04 × 10 <sup>3</sup> | +             |
| cuticles           | 160/ITT/20.14   | 29.02      | 0.39               | 2.6736384               | 4.72 × 10 <sup>2</sup> | +             |
| cuticles           | 160/ITT/20.15   | 23.24      | 0.02               | 4.4206009               | 2.63 × 10 <sup>4</sup> | +             |
| cuticles           | 160/ITT/20.16   | 26.34      | 0.04               | 3.4836487               | 3.05 × 10 <sup>3</sup> | +             |
| cuticles           | 160/ITT/20.17   | 29.86      | 0.14               | 2.4197546               | 2.63 × 10 <sup>2</sup> | +             |
| cuticles           | 160/ITT/20.18   | 22.59      | 0.37               | 4.6170586               | 4.14 × 10 <sup>4</sup> | +             |
| cuticles           | 160/ITT/20.19   | 22.34      | 0.08               | 4.6926192               | 4.93 × 10 <sup>4</sup> | +             |
| cuticles           | 160/ITT/20.20   | 27.86      | 0.26               | 3.0242399               | 1.06 × 10 <sup>3</sup> | +             |
| Swabs - Dry, -80°C | 160/ITT/20.1    | 26.78      | 0.16               | 3.3506619               | 2.24 × 10 <sup>3</sup> | +             |
| Swabs - Dry, -80°C | 160/ITT/20.2    | 29.4       | 0.04               | 2.5587862               | 3.62 × 10 <sup>2</sup> | -             |
| Swabs - Dry, -80°C | 160/ITT/20.3    | 26.77      | 0.04               | 3.3536843               | 2.26 × 10 <sup>3</sup> | +             |
| Swabs - Dry, -80°C | 160/ITT/20.4    | 24.3       | 0.16               | 4.1002237               | 1.26 × 10 <sup>4</sup> | +             |
| Swabs - Dry, -80°C | 160/ITT/20.5    | 24.7       | 0.08               | 3.9793266               | 9.54 × 10 <sup>3</sup> | +             |
| Swabs - Dry, -80°C | 160/ITT/20.6    | 26.6       | 0.32               | 3.4050656               | 2.54 × 10 <sup>3</sup> | +             |
| Swabs - Dry, -80°C | 160/ITT/20.7    | 29.29      | 0.18               | 2.5920329               | 3.91 × 10 <sup>2</sup> | -             |
| Swabs - Dry, -80°C | 160/ITT/20.8    | 26.52      | 0.38               | 3.429245                | 2.69 × 10 <sup>3</sup> | +             |
| Swabs - Dry, -80°C | 160/ITT/20.9    | 24.63      | 0.05               | 4.0004836               | 1.00 × 10 <sup>4</sup> | +             |
| Swabs - Dry, -80°C | 160/ITT/20.10   | 24.59      | 0.13               | 4.0125733               | 1.03 × 10 <sup>4</sup> | +             |
| Swabs - EtOH, RT   | 160/ITT/20.11   | 23.34      | 0.33               | 4.3903766               | 2.46 × 10 <sup>4</sup> | +             |
| Swabs - EtOH, RT   | 160/ITT/20.12   | 27.49      | 0.11               | 3.1360696               | 1.37 × 10 <sup>3</sup> | +             |
| Swabs - EtOH, RT   | 160/ITT/20.13   | 23.38      | 0.01               | 4.3782869               | 2.39 × 10 <sup>4</sup> | +             |
| Swabs - EtOH, RT   | 160/ITT/20.14   | 22.69      | 0.15               | 4.5868343               | 3.86 × 10 <sup>4</sup> | +             |
| Swabs - EtOH, RT   | 160/ITT/20.15   | 26.50      | 0.06               | 3.4352899               | 2.72 × 10 <sup>3</sup> | +             |
| Swabs - EtOH, RT   | 160/ITT/20.16   | 23.49      | 0.25               | 4.3450402               | 2.21 × 10 <sup>4</sup> | +             |
| Swabs - EtOH, RT   | 160/ITT/20.17   | 26.65      | 0.33               | 3.3899535               | 2.45 × 10 <sup>3</sup> | .*            |
| Swabs - EtOH, RT   | 160/ITT/20.18   | 25.18      | 0.07               | 3.8342501               | 6.83 × 10 <sup>3</sup> | +             |
| Swabs - EtOH, RT   | 160/ITT/20.19   | 22.68      | 0.24               | 4.5898567               | 3.89 × 10 <sup>4</sup> | +             |
| Swabs - EtOH, RT   | 160/ITT/20.20   | 27.61      | 0.28               | 3.0998005               | 1.26 × 10 <sup>3</sup> | +             |

Continue

| Sample                     | IZSVe Sample ID | Average C <sub>T</sub> | Standard Deviation | Log Starting Quantities | PFU (copies/μl)        | end point PCR |
|----------------------------|-----------------|------------------------|--------------------|-------------------------|------------------------|---------------|
| Swabs - Lysis Buffer, +4°C | 160/ITT/20.1    | 31.43                  | 0.30               | 1.9452336               | 8.82 × 10 <sup>1</sup> | -             |
| Swabs - Lysis Buffer, +4°C | 160/ITT/20.2    | 29.79                  | 0.11               | 2.4409116               | 2.76 × 10 <sup>2</sup> | .*            |
| Swabs - Lysis Buffer, +4°C | 160/ITT/20.3    | 30.25                  | 0.15               | 2.3018799               | 2.00 × 10 <sup>2</sup> | -             |
| Swabs - Lysis Buffer, +4°C | 160/ITT/20.4    | 31.5                   | 0.05               | 1.9240766               | 8.40 × 10 <sup>1</sup> | -             |
| Swabs - Lysis Buffer, +4°C | 160/ITT/20.5    | 28.35                  | 0.18               | 2.876141                | 7.52 × 10 <sup>2</sup> | -             |
| Swabs - Lysis Buffer, +4°C | 160/ITT/20.6    | 32.92                  | 0.22               | 1.4948921               | 3.13 × 10 <sup>1</sup> | -             |
| Swabs - Lysis Buffer, +4°C | 160/ITT/20.7    | 28.58                  | 0.16               | 2.8066252               | 6.41 × 10 <sup>2</sup> | .*            |
| Swabs - Lysis Buffer, +4°C | 160/ITT/20.8    | 32.92                  | 0.18               | 1.4948921               | 3.13 × 10 <sup>1</sup> | -             |
| Swabs - Lysis Buffer, +4°C | 160/ITT/20.9    | 29.87                  | 0.30               | 2.4167322               | 2.61 × 10 <sup>2</sup> | -             |
| Swabs - Lysis Buffer, +4°C | 160/ITT/20.10   | 29.97                  | 0.33               | 2.3865079               | 2.44 × 10 <sup>2</sup> | -             |
| Swabs - Dry, +4°C          | 160/ITT/20.11   | 34.96                  | 0.25               | 0.8783171               | 7.56 × 10 <sup>0</sup> | -             |
| Swabs - Dry, +4°C          | 160/ITT/20.12   | 30.4                   | 0.20               | 2.2565436               | 1.81 × 10 <sup>2</sup> | -             |
| Swabs - Dry, +4°C          | 160/ITT/20.13   | 28.59                  | 0.23               | 2.8036027               | 6.36 × 10 <sup>2</sup> | .*            |
| Swabs - Dry, +4°C          | 160/ITT/20.14   | 29.05                  | 0.54               | 2.6645711               | 4.62 × 10 <sup>2</sup> | -             |
| Swabs - Dry, +4°C          | 160/ITT/20.15   | 29.09                  | 0.21               | 2.6524814               | 4.49 × 10 <sup>2</sup> | -             |
| Swabs - Dry, +4°C          | 160/ITT/20.16   | 35.56                  | 0.11               | 0.6969715               | 4.98 × 10 <sup>0</sup> | -             |
| Swabs - Dry, +4°C          | 160/ITT/20.17   | 28.73                  | 0.34               | 2.7612888               | 5.77 × 10 <sup>2</sup> | .*            |
| Swabs - Dry, +4°C          | 160/ITT/20.18   | 30.01                  | 0.68               | 2.3744182               | 2.37 × 10 <sup>2</sup> | -             |
| Swabs - Dry, +4°C          | 160/ITT/20.19   | 29.68                  | 0.21               | 2.4741583               | 2.98 × 10 <sup>2</sup> | -             |
| Swabs - Dry, +4°C          | 160/ITT/20.20   | 29.22                  | 0.24               | 2.6131899               | 4.10 × 10 <sup>2</sup> | .*            |
