# Supplementary material for: Cuticular Swabs and eDNA as Non-Invasive Sampling Techniques to Monitor Aphanomyces astaci in Endangered White-Clawed Crayfish (Austropotamobius pallipes Complex)
Source: MDPI journal article supplement (doi:10.3390/d15020279), 2023-02-15
Supplement: s1 [file s1]

**Table S5.** Results from non-invasive sampling methods carried out in creeks with wild *A. pallipes* population. The absolute quantification was expressed in PFU (copies/ $\mu$ l) and was reported in scientific notation. Estimated quantifications below LoD level were reported in brown, N/A means no detected amplification or concordance between replicates; \*, indicates samples sequenced after *A. astaci* end-point PCR.

| #ID           | Site A               | Site B               | Site C               |
|---------------|----------------------|----------------------|----------------------|
| Swab 1        | $4.56 \times 10^1$   | $2.25 \times 10^3$ * | $7.24 \times 10^0$   |
| Swab 2        | $4.71 \times 10^1$   | $1.61 \times 10^3$ * | $1.09 \times 10^1$   |
| Swab 3        | $3.58 \times 10^3$ * | $4.17 \times 10^3$ * | $7.84 \times 10^1$   |
| Swab 4        | $4.03 \times 10^3$ * | $1.49 \times 10^4$   | $2.41 \times 10^2$   |
| Swab 5        | $1.90 \times 10^3$   | $7.20 \times 10^3$   | $1.01 \times 10^1$   |
| Swab 6        | $2.19 \times 10^1$   | $3.62 \times 10^3$   | $4.65 \times 10^1$   |
| Swab 7        | $3.57 \times 10^2$   | $1.08 \times 10^4$   | $1.53 \times 10^1$   |
| Swab 8        | $7.66 \times 10^2$   | $1.11 \times 10^4$   | $1.11 \times 10^2$ * |
| Swab 9        | $2.41 \times 10^3$   | $1.36 \times 10^1$   | N/A                  |
| Swab 10       | $1.82 \times 10^3$   | $3.81 \times 10^3$   | N/A                  |
| Swab 11       | $7.02 \times 10^0$   | $7.03 \times 10^3$   | $5.55 \times 10^1$   |
| Swab 12       | $1.25 \times 10^1$   | $2.61 \times 10^1$   | $9.85 \times 10^0$   |
| Swab 13       | $2.19 \times 10^1$   | N/A                  | $7.15 \times 10^0$   |
| Swab 14       | $8.75 \times 10^0$   | $9.13 \times 10^0$   | $1.05 \times 10^2$   |
| Swab 15       | $2.62 \times 10^1$   | $8.88 \times 10^0$   | $5.07 \times 10^1$   |
| Swab 16       | $3.99 \times 10^1$   | $1.03 \times 10^1$   | N/A                  |
| Swab 17       | $1.91 \times 10^1$   | $8.65 \times 10^0$   | $5.43 \times 10^1$   |
| Swab 18       | $3.12 \times 10^1$   | $8.39 \times 10^0$   | $6.98 \times 10^1$   |
| Swab 19       | $2.60 \times 10^1$   | $1.39 \times 10^1$   | N/A                  |
| Swab 20       | $7.91 \times 10^1$   | $4.42 \times 10^1$   | $5.69 \times 10^0$   |
| Swab 21       | $2.12 \times 10^1$   | -                    | $1.33 \times 10^1$   |
| Swab 22       | N/A                  | -                    | $7.13 \times 10^1$   |
| Swab 23       | $1.70 \times 10^1$   | -                    | $1.16 \times 10^2$ * |
| Swab 24       | $9.03 \times 10^1$   | -                    | $7.68 \times 10^1$   |
| Swab 25       | $4.35 \times 10^1$   | -                    | -                    |
| Swab 26       | N/A                  | -                    | -                    |
| Swab 27       | $1.72 \times 10^1$   | -                    | -                    |
| Swab 28       | $1.24 \times 10^1$   | -                    | -                    |
| Swab 29       | $1.44 \times 10^1$   | -                    | -                    |
| Swab 30       | $5.09 \times 10^0$   | -                    | -                    |
| eDNA filter 1 | $1.54 \times 10^1$   | $4.74 \times 10^0$   | $5.39 \times 10^0$   |
| eDNA filter 2 | $1.63 \times 10^2$   | $3.66 \times 10^0$   | $5.57 \times 10^1$   |
| eDNA filter 3 | $3.62 \times 10^1$   | $9.99 \times 10^0$   | $4.58 \times 10^1$   |
| eDNA filter 4 | $1.10 \times 10^2$   | $6.25 \times 10^1$   | $1.05 \times 10^2$   |
