# Supplementary material for: Cuticular Swabs and eDNA as Non-Invasive Sampling Techniques to Monitor Aphanomyces astaci in Endangered White-Clawed Crayfish (Austropotamobius pallipes Complex)
Source: MDPI journal article supplement (doi:10.3390/d15020279), 2023-02-15
Supplement: s1 [file s1]

**Table S3.** Results of the comparison between sampling protocols (cuticle and swab) in *P. clarkii* after their housing at the IZSve aquarium facility. The absolute quantification was expressed in PFU (copies/μl) and indicated in scientific notation was reported only for positive samples (1-20); samples from 21 to 33 were completely negative. Estimated quantification below LoD level was reported in brown; N/A means no detected amplification or discordance between replicates. End-point PCR outcomes were expressed as positive (+) and negative (-) results. \* Indicates faint amplification.

| Sample  | IZSve Sample ID | Average C <sub>T</sub> | Standard Deviation | Log Starting Quantities | PFU (copies/μl)    | end point PCR |
|---------|-----------------|------------------------|--------------------|-------------------------|--------------------|---------------|
| cuticle | 178/ITT/20.1    | 35.76                  | 0.308              | 0.26741                 | $1.85 \times 10^0$ | -             |
| cuticle | 178/ITT/20.2    | 36.38                  | 0.276              | 0.07482                 | $1.19 \times 10^0$ | -             |
| cuticle | 178/ITT/20.3    | 35.51                  | 0.506              | 0.30363                 | $2.01 \times 10^0$ | -             |
| cuticle | 178/ITT/20.4    | 36.95                  | 0.717              | 0.11661                 | $1.31 \times 10^0$ | -             |
| cuticle | 178/ITT/20.5    | -                      | -                  | -                       | N/A                | -             |
| cuticle | 178/ITT/20.6    | 35.99                  | 0.079              | 0.24527                 | $1.76 \times 10^0$ | -             |
| cuticle | 178/ITT/20.7    | -                      | -                  | -                       | N/A                | -             |
| cuticle | 178/ITT/20.8    | 35.64                  | 0.093              | 0.3566                  | $2.27 \times 10^0$ | -             |
| cuticle | 178/ITT/20.9    | 35.28                  | 0.194              | 0.44902                 | $2.81 \times 10^0$ | -             |
| cuticle | 178/ITT/20.10   | 36.96                  | 0.509              | 0.8311                  | $6.78 \times 10^0$ | +             |
| cuticle | 178/ITT/20.11   | 35.76                  | 0.308              | 0.76772                 | $5.86 \times 10^0$ | -             |
| cuticle | 178/ITT/20.12   | 36.38                  | 0.276              | 0.8414                  | $6.94 \times 10^0$ | -             |
| cuticle | 178/ITT/20.13   | 35.51                  | 0.506              | 0.75154                 | $5.64 \times 10^0$ | -             |
| cuticle | 178/ITT/20.14   | 36.95                  | 0.717              | 0.0439                  | $1.11 \times 10^0$ | -             |
| cuticle | 178/ITT/20.15   | 36.83                  | 0.614              | 0.97801                 | $9.51 \times 10^0$ | +             |
| cuticle | 178/ITT/20.16   | 35.99                  | 0.079              | 0.84637                 | $7.02 \times 10^0$ | -             |
| cuticle | 178/ITT/20.17   | 37.33                  | 0.328              | 0.2857                  | $1.93 \times 10^0$ | -             |
| cuticle | 178/ITT/20.18   | 35.64                  | 0.093              | 0.56584                 | $3.68 \times 10^0$ | -             |
| cuticle | 178/ITT/20.19   | 35.28                  | 0.194              | 1.00418                 | $1.01 \times 10^1$ | +             |
| cuticle | 178/ITT/20.20   | -                      | -                  | -                       | N/A                | -             |
| Swab    | 178/ITT/20.1t   | 31.42                  | 0.116              | 1.82588                 | $6.70 \times 10^1$ | +             |
| Swab    | 178/ITT/20.2t   | 29.98                  | 0.163              | 2.34124                 | $2.19 \times 10^2$ | +             |
| Swab    | 178/ITT/20.3t   | 30.05                  | 0.144              | 2.31785                 | $2.08 \times 10^2$ | +             |
| Swab    | 178/ITT/20.4t   | 30.42                  | 0.334              | 2.30685                 | $2.03 \times 10^2$ | +             |
| Swab    | 178/ITT/20.5t   | 28.75                  | 0.04               | 2.82151                 | $6.63 \times 10^2$ | +             |
| Swab    | 178/ITT/20.6t   | 31.42                  | 0.055              | 1.83992                 | $6.92 \times 10^1$ | -*            |
| Swab    | 178/ITT/20.7t   | 29.05                  | 0.338              | 2.63609                 | $4.33 \times 10^2$ | +             |
| Swab    | 178/ITT/20.8t   | 29.9                   | 0.273              | 2.34044                 | $2.19 \times 10^2$ | +             |
| Swab    | 178/ITT/20.9t   | 28.81                  | 0.15               | 2.76967                 | $5.88 \times 10^2$ | +             |
| Swab    | 178/ITT/20.10t  | 30.54                  | 0.035              | 2.18611                 | $1.54 \times 10^2$ | +             |
| Swab    | 178/ITT/20.11t  | 31.42                  | 0.116              | 1.79283                 | $6.21 \times 10^1$ | -*            |
| Swab    | 178/ITT/20.12t  | 29.98                  | 0.163              | 2.06132                 | $1.15 \times 10^2$ | +             |
| Swab    | 178/ITT/20.13t  | 30.05                  | 0.144              | 2.03536                 | $1.08 \times 10^2$ | +             |
| Swab    | 178/ITT/20.14t  | 30.42                  | 0.334              | 1.56292                 | $3.66 \times 10^1$ | +             |
| Swab    | 178/ITT/20.15t  | 28.75                  | 0.04               | 1.81332                 | $6.51 \times 10^1$ | +             |
| Swab    | 178/ITT/20.16t  | 31.42                  | 0.055              | 1.41895                 | $2.62 \times 10^1$ | -*            |
| Swab    | 178/ITT/20.17t  | 29.05                  | 0.338              | 2.58979                 | $3.89 \times 10^2$ | +             |
| Swab    | 178/ITT/20.18t  | 29.9                   | 0.273              | 2.21927                 | $1.66 \times 10^2$ | +             |
| Swab    | 178/ITT/20.19t  | 28.81                  | 0.15               | 2.62046                 | $4.17 \times 10^2$ | +             |
| Swab    | 178/ITT/20.20t  | 30.54                  | 0.035              | 2.10222                 | $1.27 \times 10^2$ | -*            |
