# Supplementary material for: Cuticular Swabs and eDNA as Non-Invasive Sampling Techniques to Monitor Aphanomyces astaci in Endangered White-Clawed Crayfish (Austropotamobius pallipes Complex)
Source: MDPI journal article supplement (doi:10.3390/d15020279), 2023-02-15
Supplement: s1 [file s1]

**Table S2.** Results of the *A. astaci* qPCR analysis on eDNA samples collected during *P. clarkii* housing at the IZSve aquarium facility. The absolute quantification was expressed in PFU (copies/μl) and was reported in scientific notation. Estimated quantification below LoD level was reported in brown; N/A means no detected amplification or discordance between replicates. \*, indicates samples sequenced after *A. astaci* end-point PCR.

| IZSve Sample ID | Filterd vol(L) | Filter numerosity | Filter size | Storing method | Average C <sub>t</sub> | Standard Deviation | Log Starting Qunatities | PFU (copies/μl)         |
|-----------------|----------------|-------------------|-------------|----------------|------------------------|--------------------|-------------------------|-------------------------|
| 178.ITT/20.F1a  | 0.5            | 1                 | 0.45        | -80 °C         | 31.2                   | 0.23               | 2.04                    | 1.09 × 10 <sup>2*</sup> |
| 178.ITT/20.F2a  | 0.5            | 1                 | 0.45        | -80 °C         | 33.34                  | 0.07               | 1.35                    | 2.25 × 10 <sup>1</sup>  |
| 178.ITT/20.F3a  | 0.5            | 1                 | 0.45        | -80 °C         | 32.13                  | 0.18               | 1.74                    | 5.48 × 10 <sup>1</sup>  |
| 178.ITT/20.F1b  | 0.5            | 1                 | 0.45        | EtOH           | 32.39                  | 0.31               | 1.93                    | 8.54 × 10 <sup>1</sup>  |
| 178.ITT/20.F2b  | 0.5            | 1                 | 0.45        | EtOH           | 32.44                  | 0.29               | 1.64                    | 4.35 × 10 <sup>1</sup>  |
| 178.ITT/20.F3b  | 0.5            | 1                 | 0.45        | EtOH           | 33.84                  | 0.01               | 1.19                    | 1.56 × 10 <sup>1</sup>  |
| 178.ITT/20.F4a  | 1              | 2                 | 0.45        | -80 °C         | 32.81                  | 0.07               | 1.80                    | 6.32 × 10 <sup>1</sup>  |
| 178.ITT/20.F5a  | 1              | 2                 | 0.45        | -80 °C         | 32.46                  | 0.30               | 1.63                    | 4.29 × 10 <sup>1</sup>  |
| 178.ITT/20.F6a  | 1              | 2                 | 0.45        | -80 °C         | 31.93                  | 0.06               | 1.80                    | 6.35 × 10 <sup>1</sup>  |
| 178.ITT/20.F4b  | 1              | 2                 | 0.45        | EtOH           | 31.35                  | 0.09               | 1.99                    | 9.71 × 10 <sup>1</sup>  |
| 178.ITT/20.F5b  | 1              | 2                 | 0.45        | EtOH           | 30.93                  | 0.27               | 2.12                    | 1.32 × 10 <sup>2</sup>  |
| 178.ITT/20.F6b  | 1              | 2                 | 0.45        | EtOH           | 31.16                  | 0.19               | 2.05                    | 1.12 × 10 <sup>2*</sup> |
| 178.ITT/20.F7a  | 1              | 1                 | 1.6         | -80 °C         | 32.81                  | 0.22               | 1.80                    | 6.32 × 10 <sup>1</sup>  |
| 178.ITT/20.F8a  | 1              | 1                 | 1.6         | -80 °C         | 32.46                  | 0.30               | 2.00                    | 9.89 × 10 <sup>1</sup>  |
| 178.ITT/20.F9a  | 1              | 1                 | 1.6         | -80 °C         | 31.93                  | 0.03               | 1.80                    | 6.35 × 10 <sup>1</sup>  |
| 178.ITT/20.F7b  | 1              | 1                 | 1.6         | EtOH           | 31.35                  | 0.08               | 1.99                    | 9.71 × 10 <sup>1</sup>  |
| 178.ITT/20.F8b  | 1              | 1                 | 1.6         | EtOH           | 30.93                  | 0.30               | 2.12                    | 1.32 × 10 <sup>2*</sup> |
| 178.ITT/20.F9b  | 1              | 1                 | 1.6         | EtOH           | 33.84                  | 0.32               | 1.19                    | 1.56 × 10 <sup>1</sup>  |
| 178.ITT/20.F10a | 2.5            | 1                 | 1.6         | -80 °C         | 31.2                   | 0.20               | 2.04                    | 1.09 × 10 <sup>2</sup>  |
| 178.ITT/20.F11a | 2.5            | 1                 | 1.6         | -80 °C         | 33.34                  | 0.02               | 1.35                    | 2.25 × 10 <sup>1</sup>  |
| 178.ITT/20.F12a | 2.5            | 1                 | 1.6         | -80 °C         | 32.13                  | 0.34               | 1.74                    | 5.48 × 10 <sup>1</sup>  |
| 178.ITT/20.F10a | 2.5            | 1                 | 1.6         | EtOH           | 32.39                  | 0.19               | 1.93                    | 8.54 × 10 <sup>1</sup>  |
| 178.ITT/20.F11b | 2.5            | 1                 | 1.6         | EtOH           | 32.44                  | 0.11               | 1.64                    | 4.35 × 10 <sup>1</sup>  |
| 178.ITT/20.F12b | 2.5            | 1                 | 1.6         | EtOH           | 31.16                  | 0.12               | 2.05                    | 1.12 × 10 <sup>2*</sup> |
| 178.ITT/20.F13b | 3              | 1                 | 2.7         | -80 °C         | 32.55                  | 0.12               | 2.19                    | 1.56 × 10 <sup>2</sup>  |
| 178.ITT/20.F14a | 3              | 1                 | 2.7         | -80 °C         | 32.5                   | 0.30               | 2.17                    | 1.48 × 10 <sup>2</sup>  |
| 178.ITT/20.F15a | 3              | 1                 | 2.7         | -80 °C         | 32.52                  | 0.31               | 2.16                    | 1.46 × 10 <sup>2</sup>  |
| 178.ITT/20.F13a | 3              | 1                 | 2.7         | EtOH           | 32.76                  | 0.04               | 2.09                    | 1.22 × 10 <sup>2*</sup> |
| 178.ITT/20.F14b | 3              | 1                 | 2.7         | EtOH           | 32.85                  | 0.33               | 2.06                    | 1.15 × 10 <sup>2</sup>  |
| 178.ITT/20.F15b | 3              | 1                 | 2.7         | EtOH           | 32.99                  | 0.26               | 2.01                    | 1.03 × 10 <sup>2</sup>  |
| 178.ITT/20.F16b | 5              | 1                 | 2.7         | -80 °C         | 31.57                  | 0.17               | 2.47                    | 2.94 × 10 <sup>2</sup>  |
| 178.ITT/20.F17a | 5              | 1                 | 2.7         | -80 °C         | 31.66                  | 0.01               | 2.44                    | 2.76 × 10 <sup>2</sup>  |
| 178.ITT/20.F18a | 5              | 1                 | 2.7         | -80 °C         | 31.78                  | 0.31               | 2.40                    | 2.53 × 10 <sup>2</sup>  |
| 178.ITT/20.F16a | 5              | 1                 | 2.7         | EtOH           | 30.11                  | 0.11               | 2.38                    | 2.42 × 10 <sup>2</sup>  |
| 178.ITT/20.F17b | 5              | 1                 | 2.7         | EtOH           | 32.05                  | 0.07               | 2.32                    | 2.08 × 10 <sup>2*</sup> |
| 178.ITT/20.F18b | 5              | 1                 | 2.7         | EtOH           | 32.15                  | 0.29               | 2.28                    | 1.92 × 10 <sup>2</sup>  |
