# Supplementary material for: Cuticular Swabs and eDNA as Non-Invasive Sampling Techniques to Monitor Aphanomyces astaci in Endangered White-Clawed Crayfish (Austropotamobius pallipes Complex)
Source: MDPI journal article supplement (doi:10.3390/d15020279), 2023-02-15
Supplement: s1 [file s1]

**Tables S1.** Primers and probes used for both end-point PCR (ep PCR) and quantitative PCR (qPCR) and Real-Time PCR to test the reliability of the methods proposed [87,94,101,104,105,133].

| Methods       | Target             | Primer                                          | Annealing temperature | Amplicon | References |
|---------------|--------------------|-------------------------------------------------|-----------------------|----------|------------|
| Ep PCR        | Fungi              | ITS 1F / ITS 4R                                 | 54 °C                 | 713 bp   | [101]      |
| Ep PCR        | Aquatic Bacteria   | 16SBAq F / 16SBAq R                             | 60 °C                 | 1060 bp  | [133]      |
| Ep PCR        | <i>A. astaci</i>   | 42F / 640R                                      | 59 °C                 | 569 bp   | [87]       |
| qPCR          | <i>A. astaci</i>   | AphAstITS-39F / AphAstITS-97R<br>AphAstITS-60T  | 62 °C                 | 59 bp    | [94]       |
| Real-Time PCR | <i>A. pallipes</i> | Apal_F / Apaltor_R<br>Apal_probe                | 64 °C                 | 136 bp   | [105]      |
| Real-Time PCR | <i>P. clarkii</i>  | SPY_ProCla_F / SPY_ProCla_R<br>SPY_ProCla_Probe | 56 °C                 | 65 bp    | [104]      |

### End-point PCRs

End-point PCRs were carried out with the following thermal protocol: (i) plate preheat at 94 °C for 2 min; (ii) 40 cycles of 94 °C for 30 s, 58 °C  $\pm$  4 °C for 30-60 s (according to primers) and 72 °C for 60-90 s; and (iii) final extension at 72 °C for 7 min. According to the manufacturer, each PCR contained the following reagents at their final concentration in a volume of 25  $\mu$ l: 1X Buffer, 1.5 mM MgCl<sub>2</sub>, 0.8 mM dNTPs mix, 0.25  $\mu$ M forward primer, 0.25  $\mu$ M reverse primer and 0.02 U/ $\mu$ l Platinum Taq Polymerase (Thermo Fisher Scientific). Template did not exceed 500 ng per reaction.

### Quantitative PCR

Quantitative PCR (qPCR) were carried out to detect *A. astaci* with the following fast thermal protocol (Rusch et al. 2020): (i) plate preheat at 95°C for 5 min; (ii) 50 cycles of 95 °C for 15 s, 61 °C  $\pm$  3 °C for 30 s (according to primers) and plate read to properly collect fluorescence data. PCR were performed with QuantiNova Probe PCR Kit (Qiagen) and the final volumes were modified according to the manufacturer. Final concentration: 1X Master-mix, 0.5  $\mu$ M of each primer and 0.2  $\mu$ M of probe. Each amplification was performed using 4  $\mu$ l of template without exceeding 200 ng of total DNA/reaction.

### **Real-Time PCRs**

Real-Time PCRs to detect *P. clarkii* and *A. pallipes* were carried out with adapted thermal protocol, according to Manfrin et al. (2022) and Tréguier et al. (2014), respectively. Protocols were summarized as follows: (i) plate preheat at 95°C for 5 min; (ii) 50 cycles of 95 °C for 15 s, 56/64 °C for 30 s (according to primers) and plate read to properly collect fluorescence data. PCR were performed with QuantiNova Probe PCR Kit (Qiagen) and the final volumes were modified according to the manufacturer. Final concentration: 1X Master-mix, 0.2 µM of each primer and 0.1 µM of probe. Each amplification was performed using 4 µl of template without exceeding 200 ng of total DNA/reaction.
